# Supplementary material
Source: MDPI journal article supplement (https://www.mdpi.com/2311-553X/9/3/31)
Supplement: s1 [file s1]

## Supplementary Materials

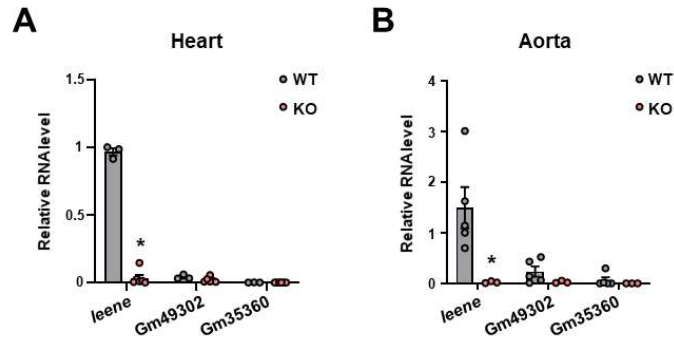

**Supplemental Figure S1. qPCR of Gm41148 (*leene*), Gm49302, and Gm35360 in mouse heart (A) and aorta (B).** 36b4 was detected as internal control. Data represent mean $\pm$ SEM. \*P < 0.05 compared to WT based on t test. n=3-6/group.

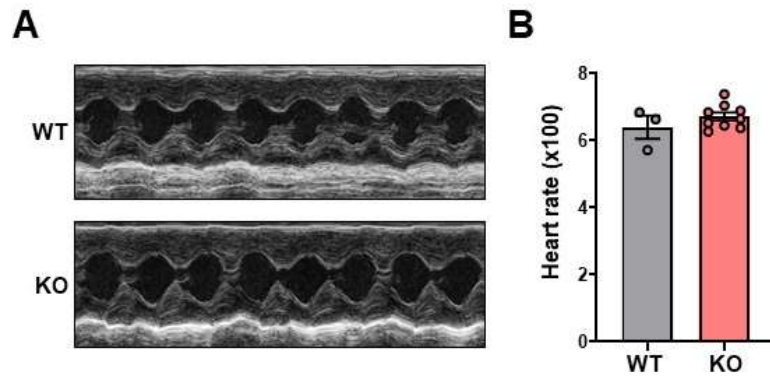

**Supplemental Figure S2. Heart function in WT and KO male mice at 6 month-old at baseline.** (A) Representative M-mode images of echocardiography and (B) heart rate from WT and *leene*-KO mice. n=3-9 mice per group. Data are represented as mean  $\pm$  SEM.

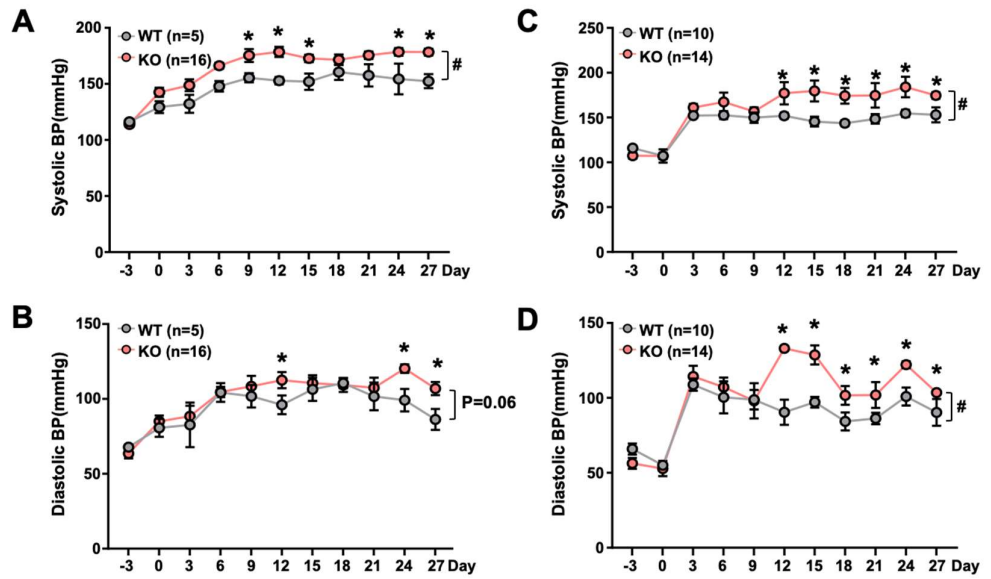

**Supplemental Figure S3. BP in two other batches of mice.** Systolic and diastolic BP in AngII-infused male mice of 6 month-old (A,B) and 4 month-old (C,D). n=5-16 mice per group in (A,B) and n=10-14 mice per group in (C,D). Data are represented as mean  $\pm$  SEM. \*P<0.05 between WT and KO mice at the same time point based on two-tailed Student's t-test. #P<0.05 between WT and KO based on repeated-measures t-test.

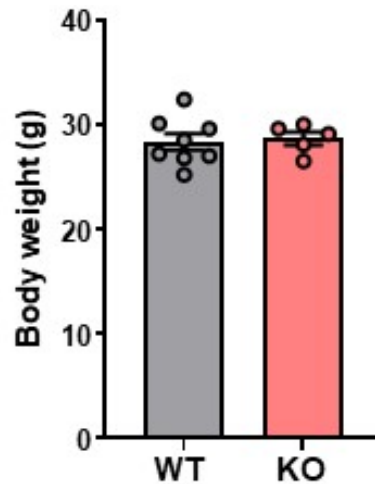

**Supplemental Figure S4. Body weight of 6 month-old WT and KO male mice with AngII infusion.** n=5-8 mice per group. Data are represented as mean  $\pm$  SEM.

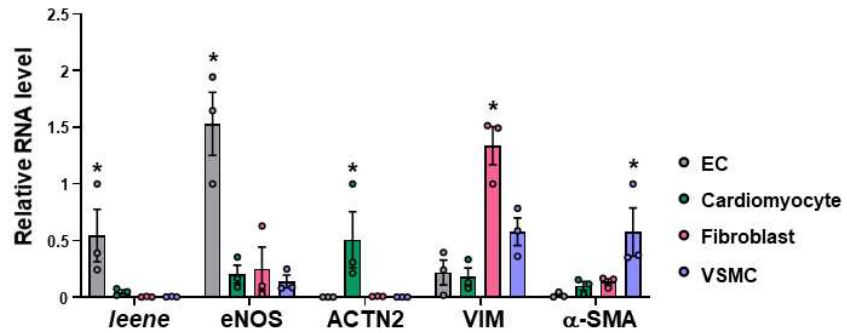

**Supplemental Figure S5. qPCR of leene and cell type markers in four different cell types in WT mice.** Data are represented as mean±SEM. \*P< 0.05 compared among 4 cell types based on one-way ANOVA followed by Dunnett's test.

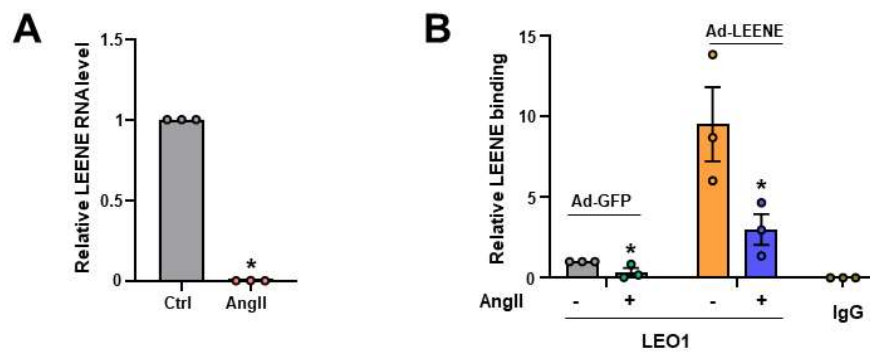

**Supplemental Figure S6. AngII decreases LEENE and its interaction with LEO1.** (A) qPCR of LEENE in HUVECs treated with vehicle control or AngII (100 nM) for 48h. (B) RIP-qPCR with LEO1 antibody to detect the interaction of LEENE and LEO1. The relative enrichment in Ad-GFP sample was set as 1. IgG was used as an antibody control. Data are represented as mean±SEM from three independent experiments. \*P < 0.05 based on t test.

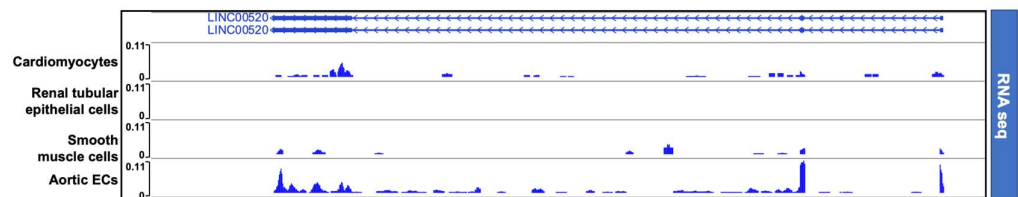

**Supplemental Figure S7. LEENE transcription levels in 4 human cell types.** RNA-seq data retrieved from ENCODE and Epigenome Roadmap showing LEENE RNA transcription in multiple human cell types as indicated.

**Supplemental Table S1. Sequences of primers**

| Gene/Primer ID   | Species | Assay  | Sequence                                                           |
|------------------|---------|--------|--------------------------------------------------------------------|
| 49 36B4          | mouse   | RT-PCR | Forward: AGATTCGGGATATGCTGTTGGC<br>Reverse: TCGGGTCCTAGACCAGTGTC   |
| 50 iNOS          | mouse   | RT-PCR | Forward: GTTCTCAGCCCAACAATACAAGA<br>Reverse: GTGGACGGGTCGATGTCAC   |
| 51 KLF4          | mouse   | RT-PCR | Forward: GGCGAGTCTGACATGGCTG<br>Reverse: GCTGGACGCAGTGTCTTCTC      |
| 52 KLF2          | mouse   | RT-PCR | Forward: GAGCCTATCTTGCCGTCCTTT<br>Reverse: CACGTTGTTTAGGTCCTCATCC  |
| 53 eNOS          | mouse   | RT-PCR | Forward: CTTGACCCAATAGCTGCTCAG<br>Reverse: CACCTACGACACCCTCAGTG    |
| 54 AGF           | mouse   | RT-PCR | Forward: ATGCACAGATCGGAGATGACT<br>Reverse: CATGCAGGGTCTTCTCATTAC   |
| 55 ATP2B1        | mouse   | RT-PCR | Forward: TGAAGGAGCTGCGATCCTCTT<br>Reverse: CTGTCCTGCTCAATTCGACT    |
| 56 leene         | mouse   | RT-PCR | Forward: TCTACCCCTTCCTGGTACAT<br>Reverse: CCCCTTTGTCCTTCCTAGGTC    |
| 57 VCAM1         | mouse   | RT-PCR | Forward: AGTTGGGGATTCCGGTTGTCT<br>Reverse: CCCCTCATTCCTTACCACCC    |
| 58 BNP           | mouse   | RT-PCR | Forward: CTGAAGGTGCTGTCCCAGAT<br>Reverse: CCTTGGTCCTTCAAGAGCTG     |
| 59 COL1          | mouse   | RT-PCR | Forward: GCTCCTCTTAGGGGCCACT<br>Reverse: ATTGGGGACCCCTTAGGCCAT     |
| 60 MYH7          | mouse   | RT-PCR | Forward: ATCAATGCAACCCTGGAGAC<br>Reverse: CGAACATGTGGTGGTTGAAG     |
| 61 Gm49302       | mouse   | RT-PCR | Forward: CTGGCACCCACTAGGATGAC<br>Reverse: AGCAAATGGTCCCTTGGGTT     |
| 62 Gm35360       | mouse   | RT-PCR | Forward: AGCCGTTGAAAAGGGTGAA<br>Reverse: CTGAGAAGGTGCTACGGGTG      |
| 63 ACTN2         | mouse   | RT-PCR | Forward: CATCGAGGAGGATTTAGGAAC<br>Reverse: CAATCTTGTGGAACCGCATTTT  |
| 64 $\alpha$ -SMA | mouse   | RT-PCR | Forward: GACTCTCTTCCAGCCATCTTTC<br>Reverse: GACAGGACGTTGTTAGCATAGA |
| 65 VIM           | mouse   | RT-PCR | Forward: TCCACACGCACCTACAGTCT<br>Reverse: CCGAGGACCGGGTCACATA      |
| 66 LEENE         | human   | RT-PCR | Forward: TTTCCCTCTTTGGGGTCTCA<br>Reverse: GCCCTTTGATGAGTGAGTCG     |
| 67 VCAM1         | human   | RT-PCR | Forward: GTCAATGTTGCCCCAGAGA<br>Reverse: TTTTCGGAGCAGGAAAGCCC      |
| 68 eNOS          | human   | RT-PCR | Forward: TGATGGCGAAGCGAGTGAAG<br>Reverse: ACTCATCCATACACAGGACCC    |
| 69 ACTB          | human   | RT-PCR | Forward: CATGTACGTTGCTATCCAGGC<br>Reverse: CTCCTTAATGTACGCACGAT    |
